# Supplementary material for: Facile Construction of Functionalized GO Nanocomposites with Enhanced Antibacterial Activity
Source: MDPI journal article supplement (doi:10.3390/nano9070913), 2019-06-26
Supplement: s1 [file s1]

## Supporting Information

# Facile Construction of Functionalized GO Nanocomposites with Enhanced Antibacterial Activity

Lei Jiang <sup>1,2</sup>, Zhongjie Zhu <sup>2</sup>, Yanyi Wen <sup>2</sup>, Shan Ye <sup>2</sup>, Chen Su <sup>2</sup>, Rui Zhang <sup>2\*</sup>, and Wei Shao <sup>1,2,\*</sup>

<sup>1</sup> Jiangsu Co-Innovation Center of Efficient Processing and Utilization of Forest Resources, Nanjing Forestry University, Nanjing 210037, China; 15655679696@163.com (L.J.)

<sup>2</sup> College of Chemical Engineering, Nanjing Forestry University, Nanjing 210037, China; 13382367651@163.com (Z.Z.); wenyanyis@163.com (Y.W.); 13451867328@163.com (S.Y.); 13260866882@163.com (C.S.)

\* Correspondence: zhangrui@njfu.edu.cn (R.Z.); w.shao@njfu.edu.cn (W.S.); Tel.: +86-25-85427024

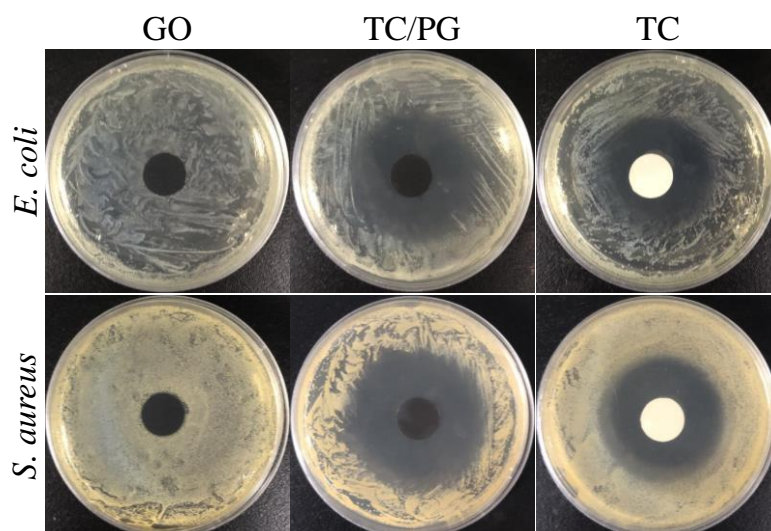

**Figure S1.** Inhibition zone pictures of GO, TC/PG and TC against *E. coli* and *S. aureus*.

**Table S1.** Diameters (mm) of Inhibition zone of GO, TC/PG and TC against *E. coli* and *S. aureus*.

|                  | GO | TC/PG      | TC         |
|------------------|----|------------|------------|
| <i>E. coli</i>   | -  | 29.5 ± 0.7 | 26.5 ± 0.7 |
| <i>S. aureus</i> | -  | 32.5 ± 0.7 | 28.5 ± 0.7 |

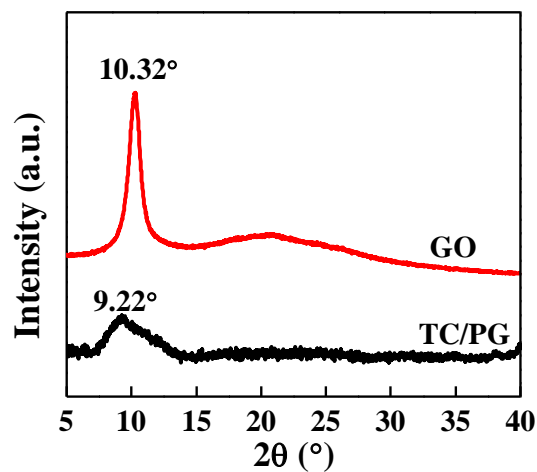

**Figure S2.** XRD spectra of GO and TC/PG nanocomposites.

The XRD patterns of GO and TC/PG nanocomposites are listed in Figure S2. The characteristic diffraction peak of GO was at  $10.32^\circ$  and the interlayer distance was calculated to be 0.88 nm according to the Bragg equation. For TC/PG nanocomposite, the interlayer distance changed to 0.98 nm because the diffraction peak shifted to  $9.22^\circ$ . The increase in the interlayer distance confirmed the successful loading of TC onto PG nanosheets.
